# Supplementary material for: Exploring the sensitivity of the large-scale atmosphere circulation to changes in surface temperature gradients using a Statistical-Dynamical Atmosphere Model
Source: Copernicus journal article supplement (doi:10.5194/npg-2018-33), 2018-06-26
Supplement: Supplementary file [file npg-2018-33-AC1-supplement.pdf]

We thank the reviewer for the time she/he took and for the comments provided, which will help us to improve the manuscript. A pointwise reply to the reviewer's comment is given below.

### Major Comments:

1.) *After the first rejection in ESDD, the new manuscript addressed pretty well the points made by reviewers in the previous submission. Authors now described very precisely the model and the model set-up used for the study, highlighting the strong points of the Statistical-dynamical Atmospheric Model SDAM-Aeolus 1.0 with respect to conventional CGMs used to investigate Hadley Cell (HC) dynamics and its changes. This represents the novelty of this study. However, it is very hard to find the main goal of the paper: in the beginning, disentangling the effect of changes in the meridional temperature gradient versus azonal temperature changes versus mean temperature changes on the boreal winter atmospheric circulation seems to be the main goal of the study. In the second part of the paper however, it seems that authors want to validate only the SDAM in order to assess its performance on the main characteristics of the atmospheric circulation under different forcing. The paper needs for sure some editorial changes: the structure itself is not bad, but the story flow is very fragmented: the introduction seems a list of "this guy did this, this other guy did that" without really telling a story, being completely unbalanced and totally unfocused. The paper itself therefore resulted in a collection of results, but it is not really clear what authors are trying to prove.*

Thank you very much for the comment. As already written by the referee, the main goal of the paper is to investigate the effect of changes in the meridional temperature gradient versus azonal temperature changes versus mean temperature changes on the boreal winter atmospheric circulation. If possible, we compare the results with literature. Since most previous studies have analyzed only the combined effect of changes in several temperature components making a direct comparison difficult. We have rewritten the introduction and discussion to improve the readability.

2.) *The abstract is totally confusing. This sentence is completely out of context: "Under global warming the temperature gradients are expected to change: Enhanced warming is expected in the Arctic, largely near the surface, and at the equator at high altitudes, altering the meridional temperature gradient. Further, land-ocean contrasts will change due to enhanced land warming. Also there is a pronounced seasonality to these warming patterns." The abstract needs substantial review, in order to reflect the text and highlight the main findings. Moreover, also from the abstract it is not really clear what authors want to prove.*

We agree with the reviewer and we have rewritten the abstract to:

Climate and weather conditions in the mid-latitudes are strongly driven by the large-scale atmosphere circulation. Observational data indicates that some components of the large-scale circulation have changed in recent decades, including the Hadley circulation, jet positions and storm tracks, but it remains unclear whether these changes are associated with greenhouse gas forcing or internal variability. Future climate simulations under high-emission scenarios show some robust changes in tropical and extra-tropical circulation but the uncertainties are large. Future simulations are characterized by enhanced warming in the Arctic at low levels and in the tropics at higher levels. In addition, land-ocean temperature contrasts are expected to change due to enhanced land-warming. The sensitivity of the large-scale circulation to these different changes in temperature gradients is not well quantified.

Here, we use a new statistical-dynamical atmosphere model (SDAM) to test the individual sensitivities of the large-scale atmospheric circulation to changes in the zonal temperature gradient, meridional temperature gradient and global-mean temperature. We analyse the Northern Hemisphere Hadley circulation, jet streams, storm tracks and planetary waves by systematically altering the zonal temperature asymmetry, the meridional temperature gradient, and the global mean temperature. Our results show that the strength of the Hadley cell, storm tracks and jet streams depends almost linearly on both the global mean temperature and the meridional temperature gradient whereas the zonal temperature asymmetry has little or no influence. The magnitude of planetary waves is affected by all three temperature components, as expected from theoretical dynamical considerations. The width of the Hadley cell behaves nonlinearly with respect to all three temperature components in the SDAM. Whether this is a model artefact or a true feature of tropical circulation should be assessed using high-resolution general circulation models.

- 3.) *Furthermore, authors insist to use inappropriate metrics for Hadley Circulation and jetstream, making results very hard to compare with the wide literature about it. This is another weakness of the study.*

We will use similar metrics as other literature used to compare the results: Integrated zonal wind velocity and maximum of the mean stream function from 3000m – 9000m.

### Specific Comments:

- 1.) *Title: “: :using a Statistical-Dynamical Atmosphere Model” Consider rephrasing as“: :using a Statistical-Dynamical Atmospheric Model”.*

Thanks, we will change the title accordingly.

2.) Page 5 In 20-21 “We change the temperature for each grid cell with respect to parameters for the three components in three steps. First, the parameter  $dT_{\phi}$  : : :”. I missed what is  $dT_{\phi}$ . I understood only it is a parameter. I guess you used a varying  $dT_{\phi}$  in order to have different sensitivities.  $dT_{\phi}$  vary in a range? Can you specify it here and not at page 6 In 4,8?

Thanks, the parameter  $w_{T_{\phi}}$  is used to vary the meridional temperature gradient by cooling/warming the poles (p. 5, l. 21) and yes, we will write the analyzed range already in page 5.

3.) Page 6 In 24: “: : :To obtain the strength of the jet stream for this analysis, we use seasonally (DJF)”. It is not clear to me why you use specifically boreal winter season. Can you say something about it?

We meant that we use zonal mean zonal wind to analyse the strength of the jet stream. Since we analysed the sensitivity of the winter circulation, we used DJF averaged zonal mean zonal wind. We will remove this word, because it is already stated in the introduction.

4.) Page 6 In 25: “: : :for simplicity define the jet stream strength as the maximum of  $\hat{a}^{\sim}$   $Nl^{\prime} \delta^{\prime} l^{\prime} S^{\prime} c^{\prime} \hat{a} N^{\sim} \dagger$  between 10 N and 80 N at 9000 m height (corresponding to a pressure level of ca. 300 mbar). I like plicity, but not oversimplifications. If you change the meridional temperature gradient, this affects 1) the position of the subtropical jet-stream ( $\phi$ ,  $plev$ ), 2) on the strength of the subtropical jet-stream. Are you really sure that your metric effectively captures the maximum and the latitude of the jet-stream under different simulated “climates”? You should be able to say something about the choice of this specific metric and find a climate-invariant metric for the jet-stream.

We agree with the referee and use instead the integrated wind velocity from 3000m – 9000m.

5.) Page 7 In 1-4: “metrics for HC”. The way you describe the metrics is confusing. Are you computing the meridional mass streamfunction? If yes, why don’t you say it, rather than saying “by computing the integrated southward mass flux in the lower troposphere between 1000 mb and 500 mb from the zonal mean meridional wind velocity”. As far as I understand this is equivalent to the classical stream-function by Oort and Yienger, 1996, Although you vertically integrated between 1000 hPa and 500 hPa. Be aware that 500 hPa is too shallow in order to get the full vertical extent of the HC, which actually it

*extends up to 200 hPa in deep tropics. I totally agree that there is confusion about metrics (I've read your reply to the reviewer from the previous submission) BUT, in order to get results comparable with literature and to avoid to introduce further confusion, you should take the vertical average of the stream-function between 400 hPa and 600 hPa, or 200 hPa and 700 hPa (usually it is a good practice to average first and stay above the boundary layer) and then calculate the width as the zero-crossing latitude. The integrated measure is not commonly used, therefore I do not recommend it. It can be potentially a wrong estimation of the HC strength. If you don't want to follow the literature, then you have to prove that YOUR metrics are consistent with the metrics used from the whole community. There is no easy way out about it. You might want to refer also to the first paper on metrics came out from a CLIVAR project on metrics for tropical width: <https://www.geosci-model-devdiscuss.net/gmd-2018-124/> The TropD software package: Standardized methods for calculating Tropical Width Diagnostics By Ori Adam , Kevin M. Grise , Paul Staten , Isla R. Simpson , Sean M. Davis, Nicholas A. Davis , Darryn W. Waugh , and Thomas Birner. So, concluding, USE THE STANDARD METRICS FOR THE HADLEY CELL.*

Yes, it is the meridional mass stream function, we will rewrite the sentence. We will use the recommended metrics (mean of the 200hPa – 700hPa stream function).

- 6.) Page 7 In 20: *“In particular, the maximum strength, defined as the minimum between the zero-crossings”. This is really not clear to me. The strength is the max or the min value inside the NH or SH HC, respectively. Then the max strength is the max between NH and the SH poleward edges for the NH HC (if the NH HC is defined positive for clockwise overturning). This is also missing in the methods: : : Conventionally, the NH HC is positive, while the SH HC is negative. If you had written the equation for the stream-function this would have clarified explicitly. Please clarify.*

*It is the maximal absolute value of the strength. In our case it is negative, since we consider the mass flux from 1000mb to 500mb and not 500mb to 1000mb.*

- 7.) Page 7 In 20-22: *“There exist bigger differences in the SH. This model bias might be related to the missing Antarctic ice sheet, upper-tropospheric ozone, the constant lapse rate assumption, or fundamental limitations of the equations.” There is more than that. The cross-equatorial HC (e.g. the winter HC) is nearly inviscid limit. Therefore, its poleward extent and its strength are not dictated by eddy momentum flux (Schneider and Bordoni, 2008). At the same time, in the opposite hemisphere, the summer HC is dominated by eddy momentum flux divergence. Probably, the poor agreement in the SH*

*is due to the statistical nature of the eddy representation in the SDAM. Therefore the use of the SDAM for HC analysis must consider only winter season. State it clearly.*

Thanks, we will include that as a possible explanation for the model bias.

8.) *Page 11 In24: "In this study, we observe a strengthening of storm track activity under increased global-mean temperature." The reference to the figure is missing. Provide it.*

Yes, we will provide it (Fig. 8).

9.) *Page 12 In 28: "In our analysis the strengthening of the planetary waves depends on all temperature components. Larger meridional and zonal temperature asymmetries as well as global mean temperatures lead to stronger winds". The reference to the figure is missing. Provide it.*

Thanks, we will provide it (Fig. 9).

## Figures:

1.) *Fig. 2 Caption: "Integrated northward mass flux in lower troposphere. : : :"* Please specify everywhere in the text that the winter you refer is the boreal winter. I have also some doubt about the magnitude. The conventional magnitude and unit for the atmospheric mass flux of the Northern Hemisphere  $\psi_{max\_DJF}$  is around  $20 \times 10^{10}$  Kg/s or 200 Sverdrup. Why do you have here Kg/ s m<sup>2</sup> and such weak values? In order to compare values with previous study it is warmly suggested to change the unit. according to the literature by performing the standard meridional mass stream-function (Oort and Yienger, 1996).

We will do as suggested.

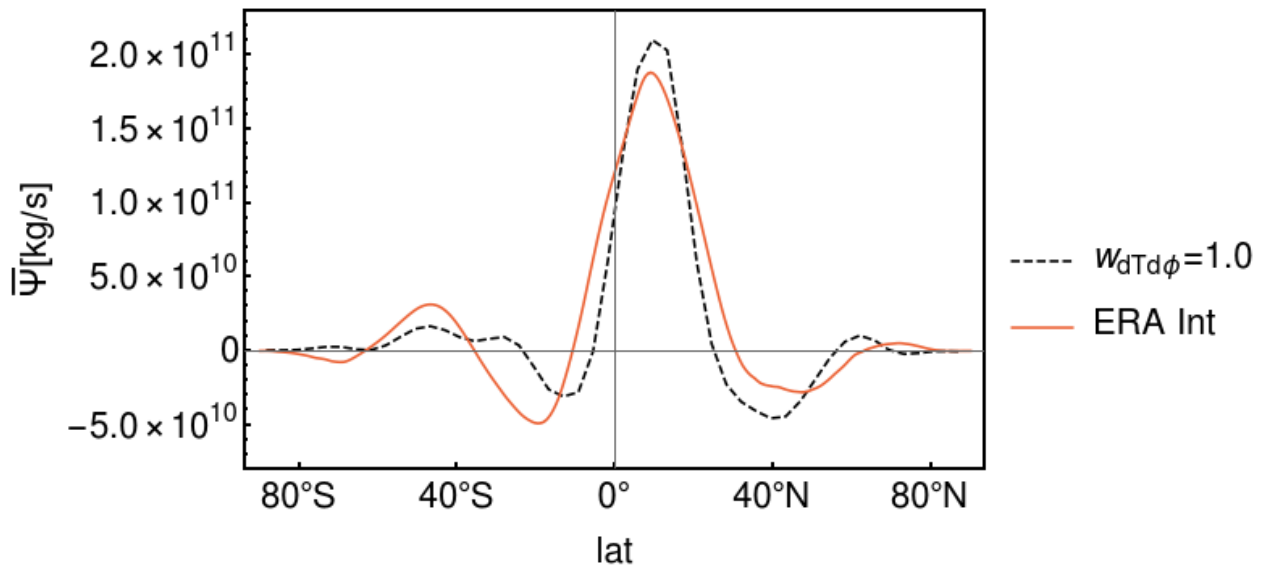

Figure 1 Integrated northward mass flux in lower troposphere. Black: Model output for  $w_{(T_\phi)}=1$  and  $w_{azonal}=1$ . Red: ERA Interim climatological boreal winter data.

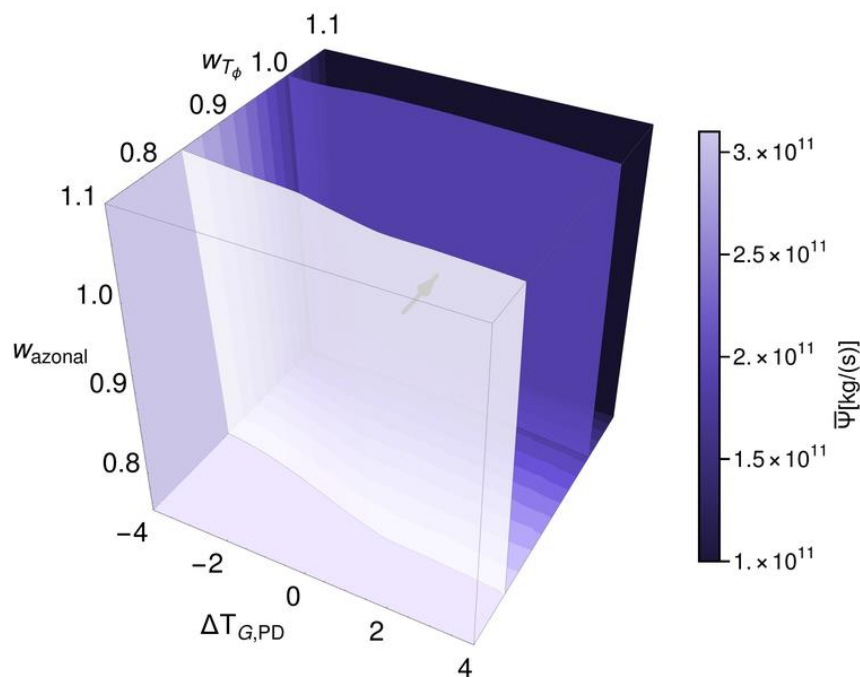

Figure 2 Strength of the Hadley cell in dependence of  $w_{(T_\phi)}$  and  $w_{azonal}$  and  $\Delta T_{(G,PD)}$ . The arrow points in the direction of the strongest gradient in boreal winter.

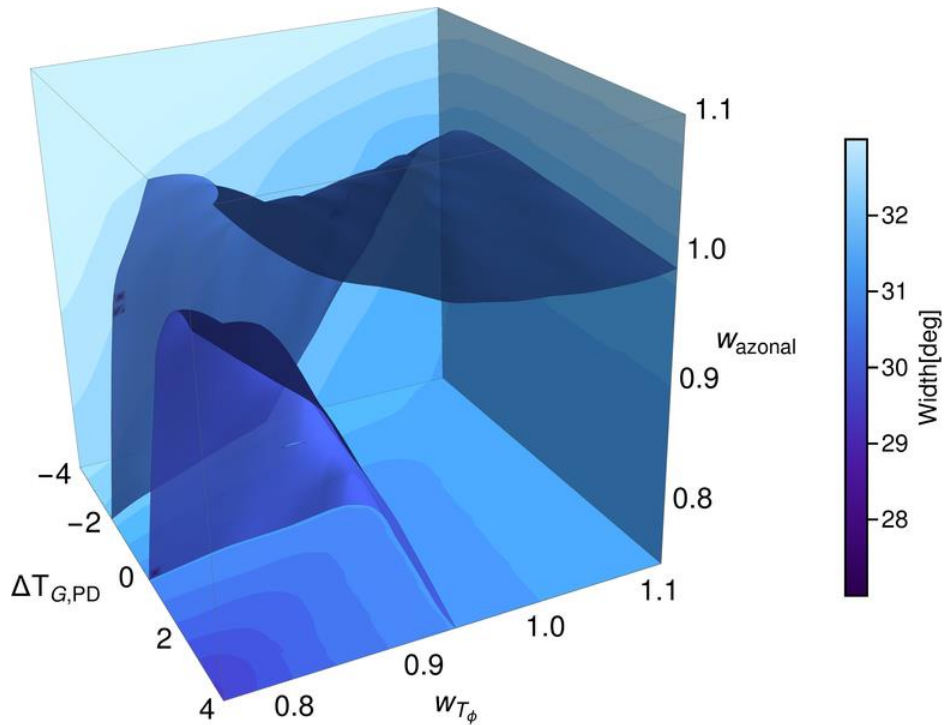

Figure 3 Width of the Hadley cell in dependence of  $w_{T_\phi}$  and  $w_{azonal}$  and  $\Delta T_{(G,PD)}$ , whereby  $\Delta T_{(G,PD)}$  is the difference between the present day temperature and the altered global mean temperature in boreal winter.

2.) Fig. 5 Panel a) has not the same size of the others. Furthermore, x-labels of panels b,c,d are incorrect: it is supposed to be the latitude, right? Then, label correctly please. Please also write the unit of  $\langle u \rangle$  (should be m/s, right?). Additionally, in panel a) you have pressure levels on the y-axis: why do you have altitude in meters for panels b,c,d? Please be consistent throughout panels. The same for Fig. 7.

Thanks, we will correct it.

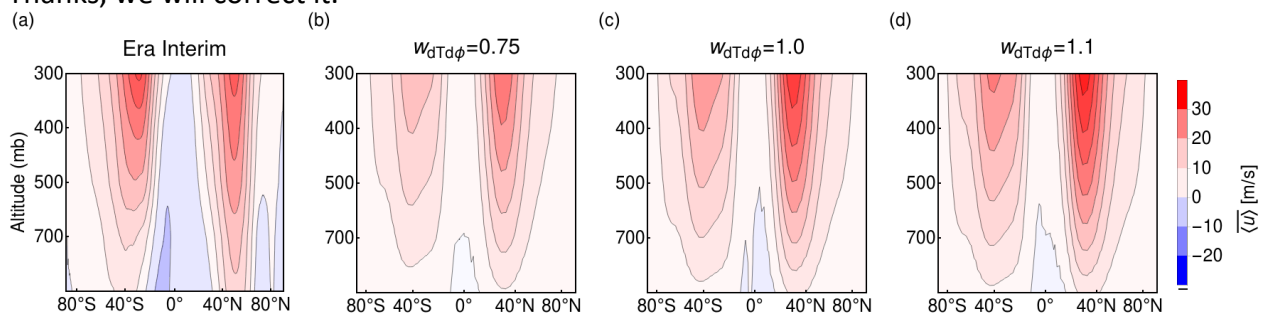

Figure 4 Zonal mean zonal wind velocity  $\langle u \rangle$  representing the jet streams in boreal winter. The subpanel (a) shows ERA-Interim data, the others results from Aeolus with different  $w_{T_\phi}$ . In (b)  $w_{T_\phi} = 0.75$ , in (c)  $w_{T_\phi} = 1.0$  and in (d)  $w_{T_\phi} = 1.1$ . All other parameters are set to standard values.

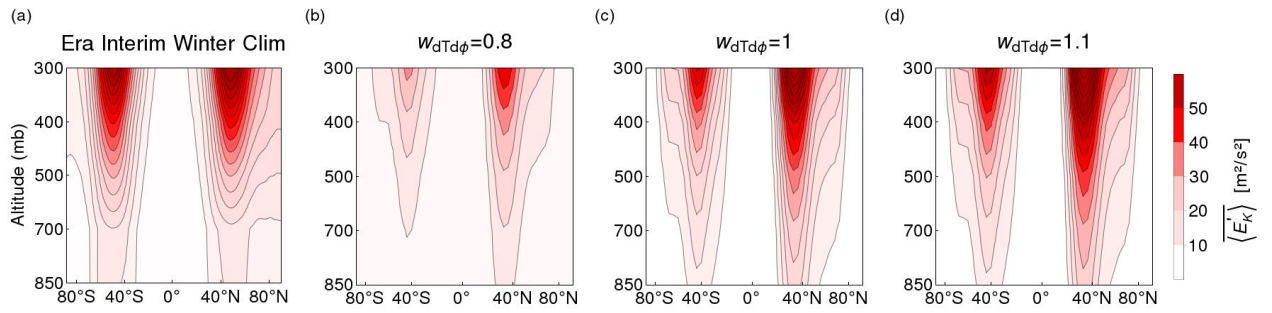

**Figure 5** Eddy kinetic energy representing storm track activity in boreal winter.. Panel (a) shows ERA Interim data, and (b)-(d) from Aeolus with different poleward temperature gradients  $w_{T\phi}$ . In (b)  $w_{T\phi} = 0.75$ , in (c)  $w_{T\phi} = 1.0$  and in (d)  $w_{T\phi} = 1.1$ . All other parameters are set to climatology. With larger gradients the storm track activity gets stronger.
